# Supplementary material for: Investigating the Short-Term Effects of Cold Stress on Metabolite Responses and Metabolic Pathways in Inner-Mongolia Sanhe Cattle
Source: MDPI journal article supplement (doi:10.3390/ani11092493), 2021-08-25
Supplement: s1 [file s1]

**Table S1.** The concentrations of metabolites in the serum of Sanhe cattle.

| Metabolites            | Before (mmol/L) |       | After (mmol/L) |       |
|------------------------|-----------------|-------|----------------|-------|
|                        | Range           | Mean  | Range          | Mean  |
| 3-Hydroxybutyrate      | 0.132-0.364     | 0.242 | 0.268-0.371    | 0.305 |
| 3-Hydroxyisobutyrate   | 0.014-0.027     | 0.019 | 0.020-0.033    | 0.029 |
| 4-Hydroxyphenylacetate | 0.024-0.045     | 0.033 | 0.027-0.051    | 0.040 |
| Acetate                | 0.346-1.126     | 0.675 | 0.511-0.889    | 0.732 |
| Acetone                | 0.010-0.029     | 0.016 | 0.015-0.021    | 0.018 |
| Alanine                | 0.145-0.232     | 0.183 | 0.098-0.242    | 0.163 |
| Arabinose              | 0.016-0.028     | 0.020 | 0.000-0.034    | 0.017 |
| Arginine               | 0.054-0.128     | 0.101 | 0.059-0.163    | 0.107 |
| Betaine                | 0.108-0.24      | 0.160 | 0.096-0.276    | 0.159 |
| Choline                | 0.008-0.012     | 0.010 | 0.008-0.012    | 0.009 |
| Citrate                | 0.119-0.231     | 0.161 | 0.114-0.224    | 0.164 |
| Citrulline             | 0.033-0.083     | 0.050 | 0.033-0.086    | 0.057 |
| Creatine               | 0.150-0.221     | 0.181 | 0.154-0.242    | 0.195 |
| Creatine phosphate     | 0.008-0.016     | 0.012 | 0.000-0.021    | 0.008 |
| Creatinine             | 0.053-0.109     | 0.080 | 0.062-0.108    | 0.091 |
| Dimethyl sulfone       | 0.013-0.052     | 0.024 | 0.015-0.043    | 0.027 |
| Ethanol                | 0.010-0.016     | 0.013 | 0.008-0.018    | 0.013 |
| Formate                | 0.021-0.04      | 0.027 | 0.021-0.036    | 0.027 |
| Glucose                | 3.190-3.665     | 3.372 | 2.987-3.785    | 3.416 |
| Glutamate              | 0.028-0.082     | 0.049 | 0.032-0.07     | 0.049 |
| Glutamine              | 0.102-0.189     | 0.143 | 0.118-0.187    | 0.151 |
| Glycine                | 0.077-0.17      | 0.118 | 0.070-0.204    | 0.119 |
| Hippurate              | 0.021-0.038     | 0.031 | 0.033-0.053    | 0.044 |
| Histidine              | 0.035-0.047     | 0.041 | 0.026-0.047    | 0.038 |
| Isoleucine             | 0.063-0.104     | 0.081 | 0.063-0.128    | 0.091 |
| Isopropanol            | 0.003-0.005     | 0.004 | 0.003-0.007    | 0.005 |
| Lactate                | 0.406-1.592     | 0.846 | 0.423-1.348    | 0.853 |
| Leucine                | 0.075-0.136     | 0.102 | 0.087-0.148    | 0.118 |
| Lysine                 | 0.058-0.078     | 0.068 | 0.041-0.108    | 0.076 |
| Malonate               | 0.010-0.021     | 0.015 | 0.013-0.022    | 0.017 |
| Methanol               | 0.093-0.129     | 0.103 | 0.096-0.173    | 0.123 |
| Methionine             | 0.014-0.023     | 0.018 | 0.018-0.027    | 0.021 |
| Phenylalanine          | 0.031-0.043     | 0.037 | 0.035-0.055    | 0.043 |
| Proline                | 0.051-0.08      | 0.066 | 0.047-0.075    | 0.060 |
| Propionate             | 0.006-0.018     | 0.009 | 0.010-0.018    | 0.014 |
| Pyruvate               | 0.014-0.075     | 0.042 | 0.029-0.062    | 0.046 |
| Threonine              | 0.021-0.044     | 0.037 | 0.024-0.065    | 0.042 |
| Trimethylamine N-oxide | 0.000-0.000     | 0.000 | 0.000-0.055    | 0.031 |
| Valine                 | 0.176-0.256     | 0.209 | 0.178-0.295    | 0.233 |

|                           |             |       |             |       |
|---------------------------|-------------|-------|-------------|-------|
| Myo-Inositol              | 0.012-0.023 | 0.018 | 0.016-0.027 | 0.022 |
| Trans-4-Hydroxy-L-proline | 0.015-0.028 | 0.020 | 0.017-0.031 | 0.023 |

**Table S2.** Metabolite pairs with a difference of correlation coefficient more than 1 between before and after severe cold stress in Sanhe cattle.

| Metabolite1            | Metabolite 2           | Correlation<br>coefficient<br>(before) | Correlation<br>coefficient<br>(after) | Difference |
|------------------------|------------------------|----------------------------------------|---------------------------------------|------------|
| Creatine phosphate     | Methanol               | 0.78**                                 | -0.82**                               | 1.6        |
| Creatine phosphate     | Propionate             | 0.55                                   | -0.76*                                | 1.31       |
| 3-Hydroxyisobutyrate   | 4-Hydroxyphenylacetate | 0.69*                                  | -0.52                                 | 1.21       |
| Hippurate              | Methionine             | 0.77**                                 | -0.4                                  | 1.17       |
| 4-Hydroxyphenylacetate | Methanol               | 0.65*                                  | -0.52                                 | 1.17       |
| Dimethyl sulfone       | Propionate             | 0.82**                                 | -0.29                                 | 1.11       |
| 4-Hydroxyphenylacetate | Propionate             | 0.82**                                 | -0.28                                 | 1.1        |
| 3-Hydroxybutyrate      | Betaine                | -0.71*                                 | 0.39                                  | 1.1        |
| 3-Hydroxybutyrate      | 3-Hydroxyisobutyrate   | 0.75*                                  | -0.33                                 | 1.08       |
| Creatine               | Creatine phosphate     | 0.79**                                 | -0.27                                 | 1.06       |
| 3-Hydroxyisobutyrate   | Valine                 | 0.70*                                  | -0.31                                 | 1.01       |
| 4-Hydroxyphenylacetate | Dimethyl sulfone       | 0.74*                                  | -0.27                                 | 1.01       |

Notes: \*:  $P$ -value < 0.05; \*\*:  $P$ -value < 0.01.

**Table S3.** Relevant metabolic pathway by enrichment analysis with 19 differential metabolites in Sanhe cattle.

| Metabolic pathways                         | Total | Expected | Hits | Raw p    |
|--------------------------------------------|-------|----------|------|----------|
| Glycine and Serine Metabolism              | 59    | 1.09     | 4    | 2.01E-02 |
| Betaine Metabolism                         | 21    | 0.39     | 2    | 4.55E-02 |
| Valine, Leucine and Isoleucine Degradation | 60    | 1.11     | 3    | 9.49E-02 |
| Fatty Acid Biosynthesis                    | 35    | 0.65     | 2    | 1.35E-01 |
| Propanoate Metabolism                      | 42    | 0.78     | 2    | 1.81E-01 |
| Methionine Metabolism                      | 43    | 0.80     | 2    | 1.88E-01 |
| Glucose-Alanine Cycle                      | 13    | 0.24     | 1    | 2.17E-01 |
| Vitamin K Metabolism                       | 14    | 0.26     | 1    | 2.32E-01 |
| Arginine and Proline Metabolism            | 53    | 0.98     | 2    | 2.58E-01 |
| Alanine Metabolism                         | 17    | 0.32     | 1    | 2.75E-01 |
| Phosphatidylinositol Phosphate Metabolism  | 17    | 0.32     | 1    | 2.75E-01 |
| Spermidine and Spermine Biosynthesis       | 18    | 0.33     | 1    | 2.88E-01 |

|                                       |    |       |   |          |
|---------------------------------------|----|-------|---|----------|
| Ethanol Degradation                   | 19 | 0.353 | 1 | 3.02E-01 |
| Glutathione Metabolism                | 21 | 0.39  | 1 | 3.28E-01 |
| Inositol Phosphate Metabolism         | 26 | 0.48  | 1 | 3.89E-01 |
| Phenylalanine and Tyrosine Metabolism | 28 | 0.52  | 1 | 4.12E-01 |
| Selenoamino Acid Metabolism           | 28 | 0.52  | 1 | 4.12E-01 |
| Urea Cycle                            | 29 | 0.54  | 1 | 4.23E-01 |
| Inositol Metabolism                   | 33 | 0.61  | 1 | 4.66E-01 |
| Amino Sugar Metabolism                | 33 | 0.61  | 1 | 4.66E-01 |
| Aspartate Metabolism                  | 35 | 0.649 | 1 | 4.87E-01 |
| Galactose Metabolism                  | 38 | 0.705 | 1 | 5.16E-01 |
| Pyruvate Metabolism                   | 48 | 0.891 | 1 | 6.02E-01 |
| Glutamate Metabolism                  | 49 | 0.909 | 1 | 6.09E-01 |
| Tryptophan Metabolism                 | 60 | 1.11  | 1 | 6.86E-01 |
| Tyrosine Metabolism                   | 72 | 1.34  | 1 | 7.53E-01 |

**Table S4.** Networks between metabolites and genes associated with severe cold stress.

| Pathway                                                                   | Num_g | Genes              | Num_m | Metabolites                                                                          | FDR          |
|---------------------------------------------------------------------------|-------|--------------------|-------|--------------------------------------------------------------------------------------|--------------|
| Metabolism of amino acids and derivatives                                 | 8     | <i>RPLP2;HN</i>    | 9     | 3-Hydroxyisobutyrate;                                                                | 0.0000501*** |
|                                                                           |       | <i>MT;DLD;RP</i>   |       | Creatine                                                                             |              |
|                                                                           |       | <i>S18;RPL22L</i>  |       | phosphate;Creatinine;Acetate;                                                        |              |
|                                                                           |       | <i>1;CRYM;RA</i>   |       | Valine;Creatine;Betaine;Metha                                                        |              |
|                                                                           |       | <i>RS;MRPL30</i>   |       | nol;Leucine                                                                          |              |
| SLC-mediated transmembrane transport                                      | 1     | <i>SLC30A6</i>     | 8     | Propionate;Creatinine;Acetate; Valine;3-Hydroxybutyrate;Betaine;Myo-Inositol;Leucine | 0.00023***   |
| Transport of bile salts and organic acids, metal ions and amine compounds | 1     | <i>SLC30A6</i>     | 6     | Creatinine; Valine;3-Hydroxybutyrate;Betaine;Myo-Inositol;Leucine                    | 0.000481***  |
| Transport of small molecules                                              | 6     | <i>NPC1;FXY</i>    | 8     | Propionate;Creatinine;Acetate;                                                       | 0.000833***  |
|                                                                           |       | <i>D3;EIF2S3;L</i> |       | Valine;3-                                                                            |              |
|                                                                           |       | <i>IPA;LPL;SL</i>  |       | Hydroxybutyrate;Betaine;Myo                                                          |              |
| Propanoate metabolism                                                     | 2     | <i>C30A6</i>       | 3     | -Inositol;Leucine                                                                    | 0.0318*      |
| Metabolism                                                                | 19    | <i>DLD;ECHD</i>    |       | Acetate;Methanol;Propionate                                                          |              |
|                                                                           |       | <i>C1</i>          |       | 3-                                                                                   |              |
|                                                                           |       | <i>NUP98;CH</i>    | 13    | Hydroxyisobutyrate;Propionat                                                         | 0.0387*      |
|                                                                           |       | <i>KB;COQ10A</i>   |       | e;Creatine                                                                           |              |
|                                                                           |       | <i>;CRYM;GD</i>    |       | phosphate;Creatinine;Acetate;                                                        |              |
|                                                                           |       | <i>PD1;HNMT;</i>   |       |                                                                                      |              |

|                                                                                            |   |                                                                                                                               |   |                                                                                                    |         |
|--------------------------------------------------------------------------------------------|---|-------------------------------------------------------------------------------------------------------------------------------|---|----------------------------------------------------------------------------------------------------|---------|
|                                                                                            |   | <i>DGAT2;DL<br/>D;RPS18;R<br/>ARS;HPGD;<br/>RPE;SLC25<br/>A20;PFKFB3<br/>;LPL;RPL22<br/>L1;UQCRFS<br/>1;RPLP2;M<br/>RPL30</i> |   | Valine;Trimethylamine N-<br>oxide;Creatine;Betaine;Methan<br>ol;Hippurate;Myo-<br>Inositol;Leucine |         |
| Glycine, serine,<br>alanine, and<br>threonine metabolism                                   | 2 | <i>NUP98;DL<br/>D</i>                                                                                                         | 4 | Acetate;Creatine;Creatine<br>phosphate;Betaine                                                     | 0.0387* |
| Trans-sulfuration<br>pathway                                                               | 1 | <i>DLD</i>                                                                                                                    | 3 | Creatine;Creatine<br>phosphate;Creatinine                                                          | 0.0408* |
| Histidine, lysine,<br>phenylalanine,<br>tyrosine, proline, and<br>tryptophan<br>catabolism | 3 | <i>HNMT;DLD<br/>;CRYM</i>                                                                                                     | 3 | Methanol;Valine;Leucine                                                                            | 0.0408* |
| Amino Acid<br>metabolism                                                                   | 4 | <i>HNMT;DLD<br/>;WARS;RAR<br/>S</i>                                                                                           | 3 | Valine;Creatine<br>phosphate;Leucine                                                               | 0.059   |
| Branched-chain<br>amino acid<br>catabolism                                                 | 1 | <i>DLD</i>                                                                                                                    | 3 | 3-<br>Hydroxyisobutyrate;Valine;Le<br>ucine                                                        | 0.0735  |
| Translation                                                                                | 9 | <i>RPLP2;SRP<br/>72;RPS18;R<br/>ARS;EIF2S3;<br/>RPL22L1;EI<br/>F2B1;WARS<br/>;MRPL30</i>                                      | 2 | Valine;Leucine                                                                                     | 0.0754  |
| tRNA charging                                                                              | 2 | <i>WARS;RAR<br/>S</i>                                                                                                         | 2 | Valine;Leucine                                                                                     | 0.0843  |

Notes: Num\_g: number of gene; Num\_m: number of metabolites; \*:  $P$ -value < 0.05; \*\*:  $P$ -value < 0.01.

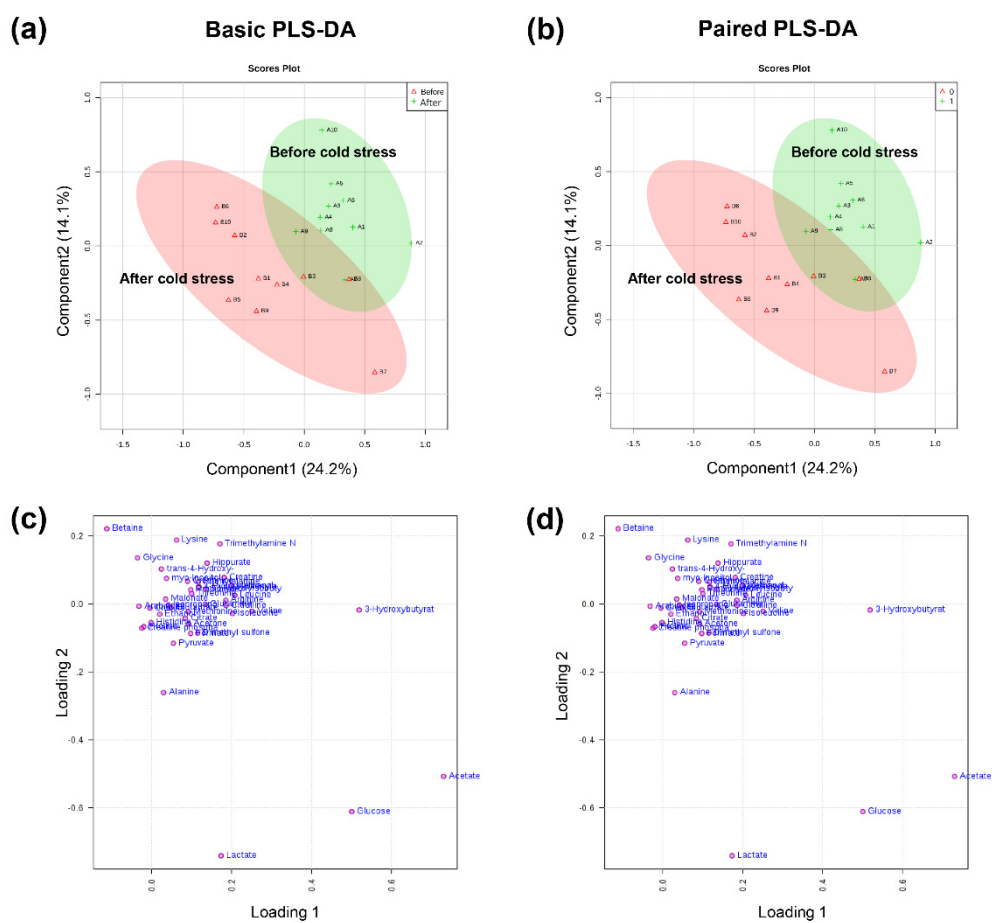

**Figure S1.** The comparison between standard PLS-DA and paired PLS-DA. (a) The scores plot of standard PLS-DA. (b) The scores plot of paired PLS-DA. (c) The loading plot of standard PLS-DA. (d) The loading plot of paired PLS-DA.
